# Supplementary material for: Optimization of Bioactive Ingredient Extraction from Chinese Herbal Medicine Glycyrrhiza glabra: A Comparative Study of Three Optimization Models
Source: Hindawi journal article supplement (doi:10.1155/2018/6391414), 2018-01-01

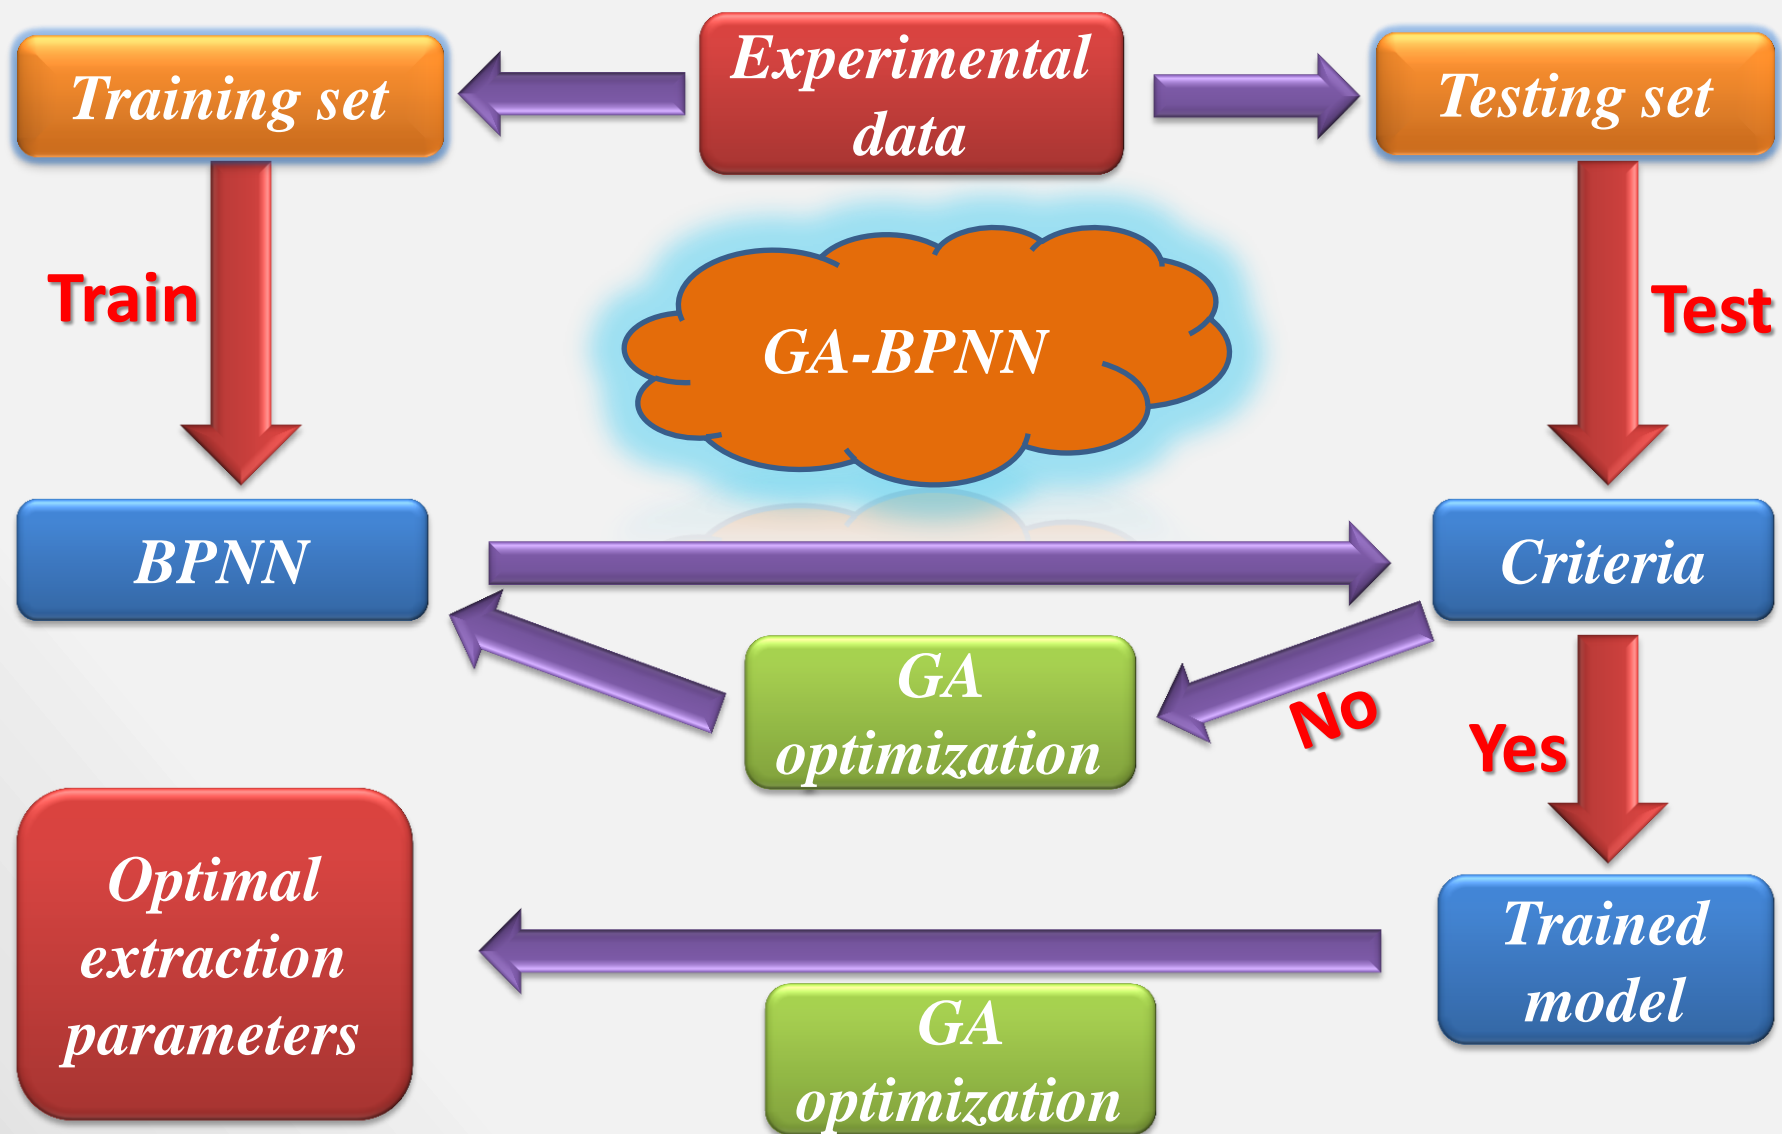

Supplement: f1 [file 6391414.f1.pdf]
